# Supplementary material for: Simple and convenient G-quadruplex-based fluorescence assay of micrococcal nuclease activity
Source: Royal Society of Chemistry journal article supplement (doi:10.1039/c5ra20773h), 2015-01-01
Supplement: c5ra20773h1.pdf [file c5ra20773h1.pdf]

## **Electronic supplementary information**

# **Simple and convenient G-quadruplex-based fluorescent assay of micrococcal nuclease activity**

Yue He\* and Bining Jiao

\* To whom correspondence should be addressed. Dr. Yue He, E-mail: [yhe@swu.edu.cn](mailto:yhe@swu.edu.cn), Tel: 86-23-68349603, Fax: 86-23-68349046

\*Corresponding author:

<sup>a</sup>Laboratory of Quality & Safety Risk Assessment for Citrus Products (Chongqing), Ministry of Agriculture, Citrus Research Institute, Southwest University, Chongqing, 400712, China.

<sup>b</sup>National Citrus Engineering Research Center, Chongqing, 400712, China

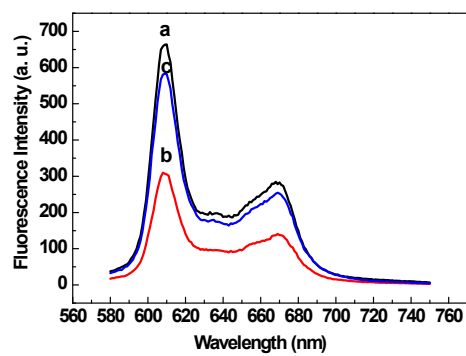

Figure S1 Comparison the fluorescence intensity caused by the adding order of MNase and  $K^+$ . (a)  $d[G_3(T_4G_3)_3] + K^+ + NMM$ ; (b)  $d[G_3(T_4G_3)_3] + MNase + K^+ + NMM$ ; (c)  $d[G_3(T_4G_3)_3] + K^+ + MNase + NMM$ . Concentration:  $d[G_3(T_4G_3)_3]$ ,  $2 \mu M$ ; MNase,  $1.2 \times 10^{-3}$  units/mL;  $K^+$ , 5 mM; NMM,  $0.8 \mu M$ . Excitation: 399 nm.

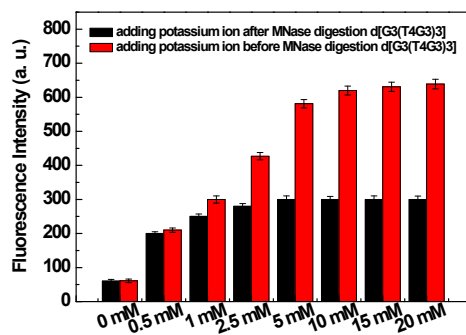

Figure S2 Comparison the fluorescence intensity caused by the adding order of MNase and K<sup>+</sup> with increasing concentration of K<sup>+</sup>.

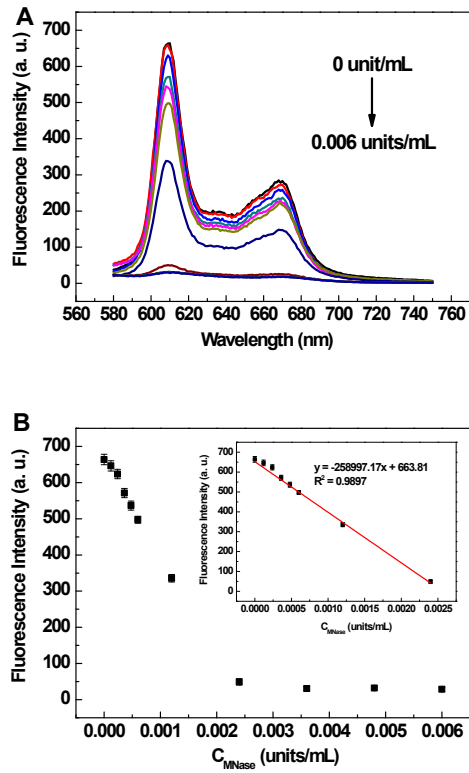

Figure S3 Fluorescence emission spectra of G-quadruplex-based biosensor in the presence of increasing amount of MNase in 10% culture medium (A) and fluorescence intensity of G-quadruplex-based biosensor in the presence of different concentration of MNase (inset: calibration curve for MNase detection) in 10% culture medium (B). Excitation: 399 nm.
